# Supplementary material
Source: PubMed Central journal article supplement (PMC1913847)
Supplement: pnas_0704967104_3.pdf [file pnas_0704967104_3.pdf]

Figure 7 (a): protease-sensitive region

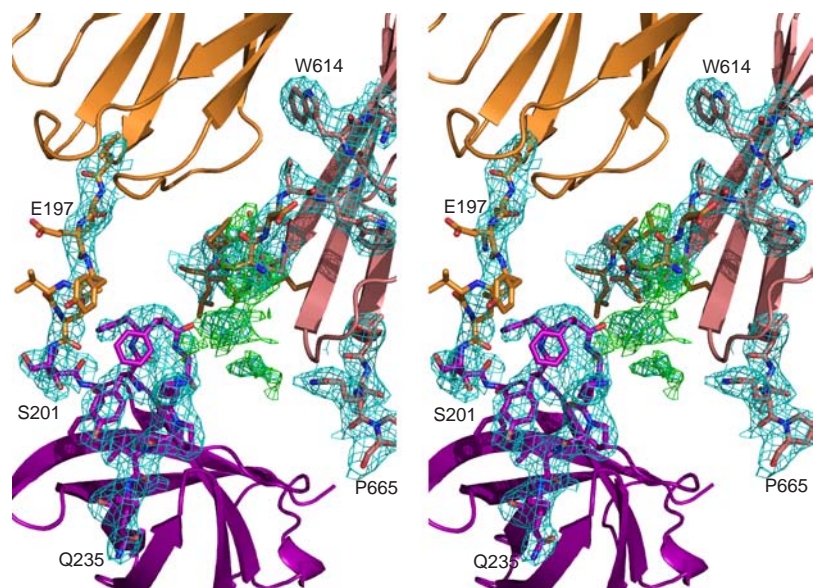

cross-eye

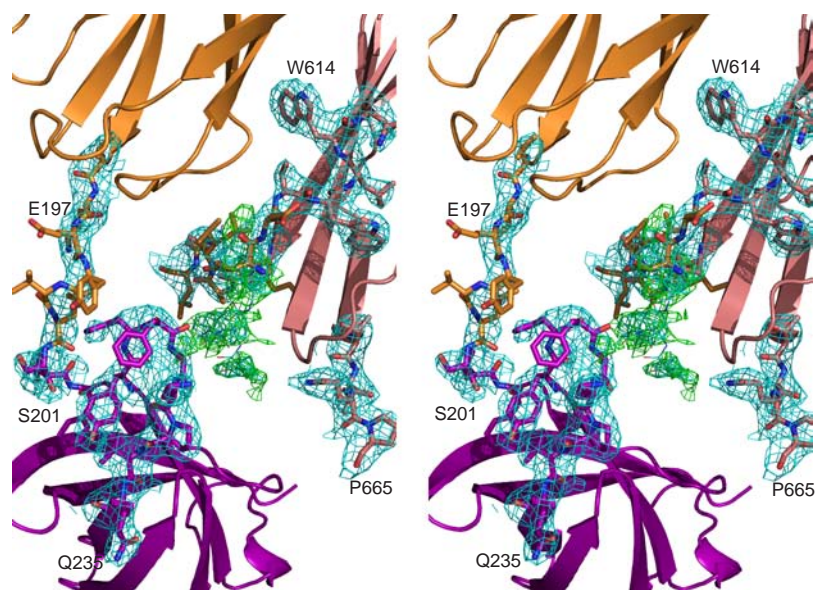

wall-eye

Figure 7 (b): MG3/MG8 interface

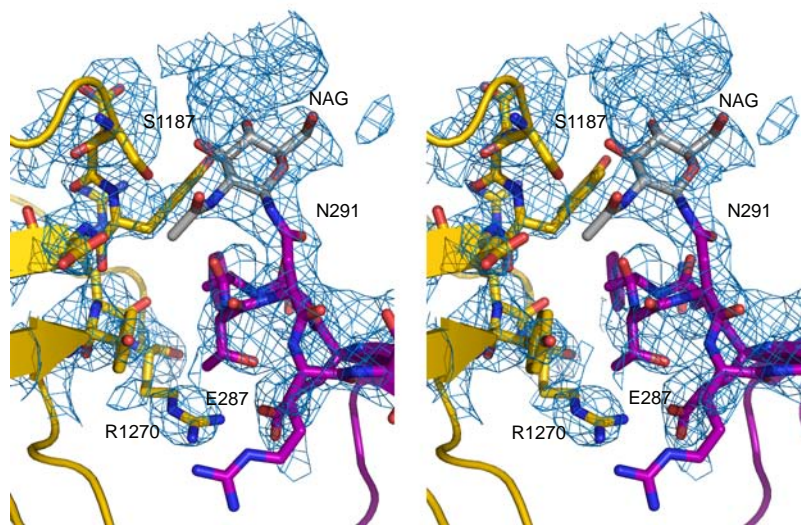

cross-eye

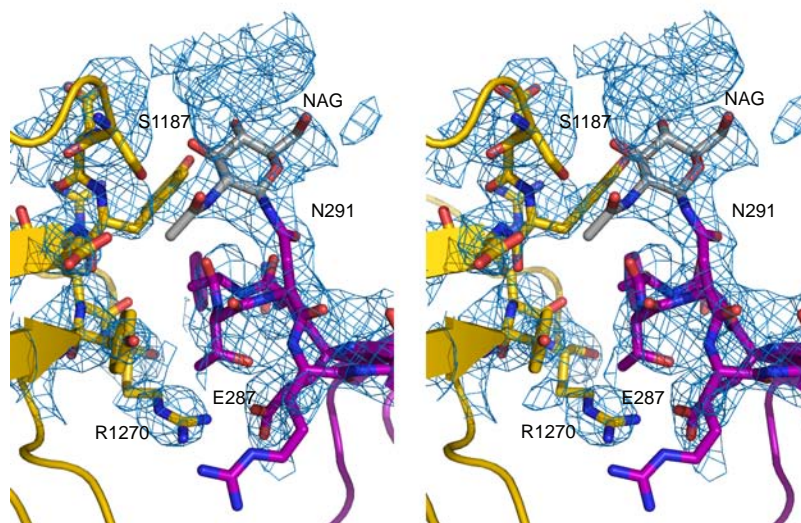

wall-eye

Figure 7 (c): TED/MG8 interface

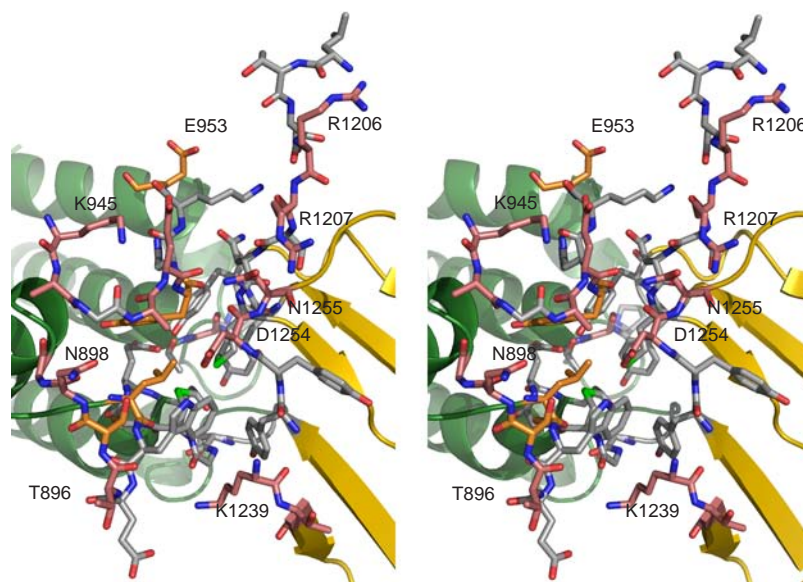

cross-eye

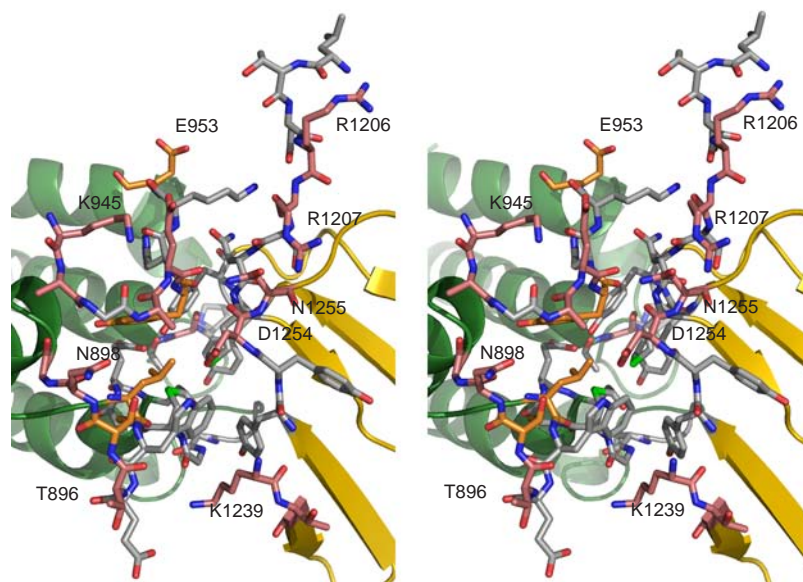

wall-eye

Figure 7 (d):  $\beta$ -hairpin motif

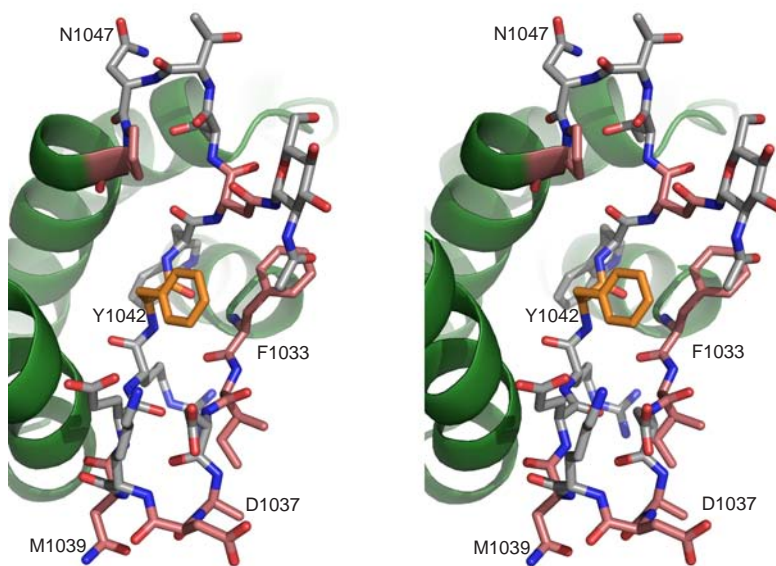

cross-eye

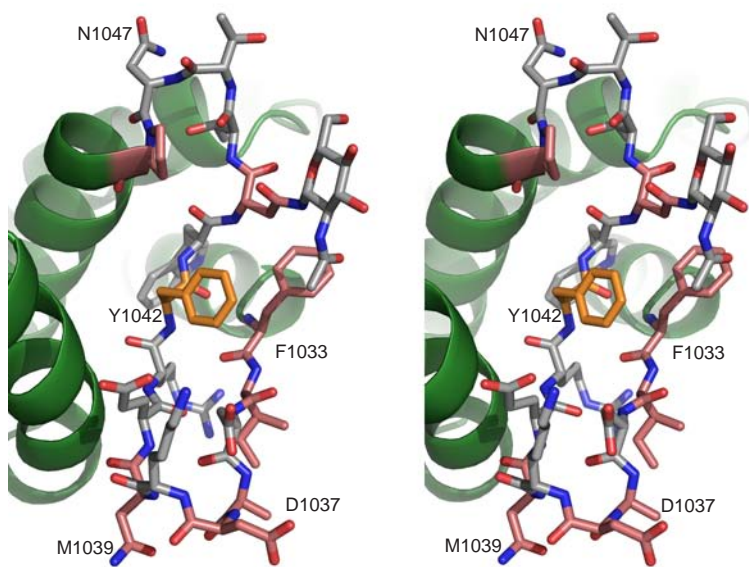

wall-eye
